# Supplementary material for: Promising vaccine models against astrovirus MLB2 using integrated vaccinomics and immunoinformatics approaches
Source: Royal Society of Chemistry journal article supplement (doi:10.1039/d3me00192j), 2024-01-01
Supplement: d3me00192j1.pdf [file d3me00192j1.pdf]

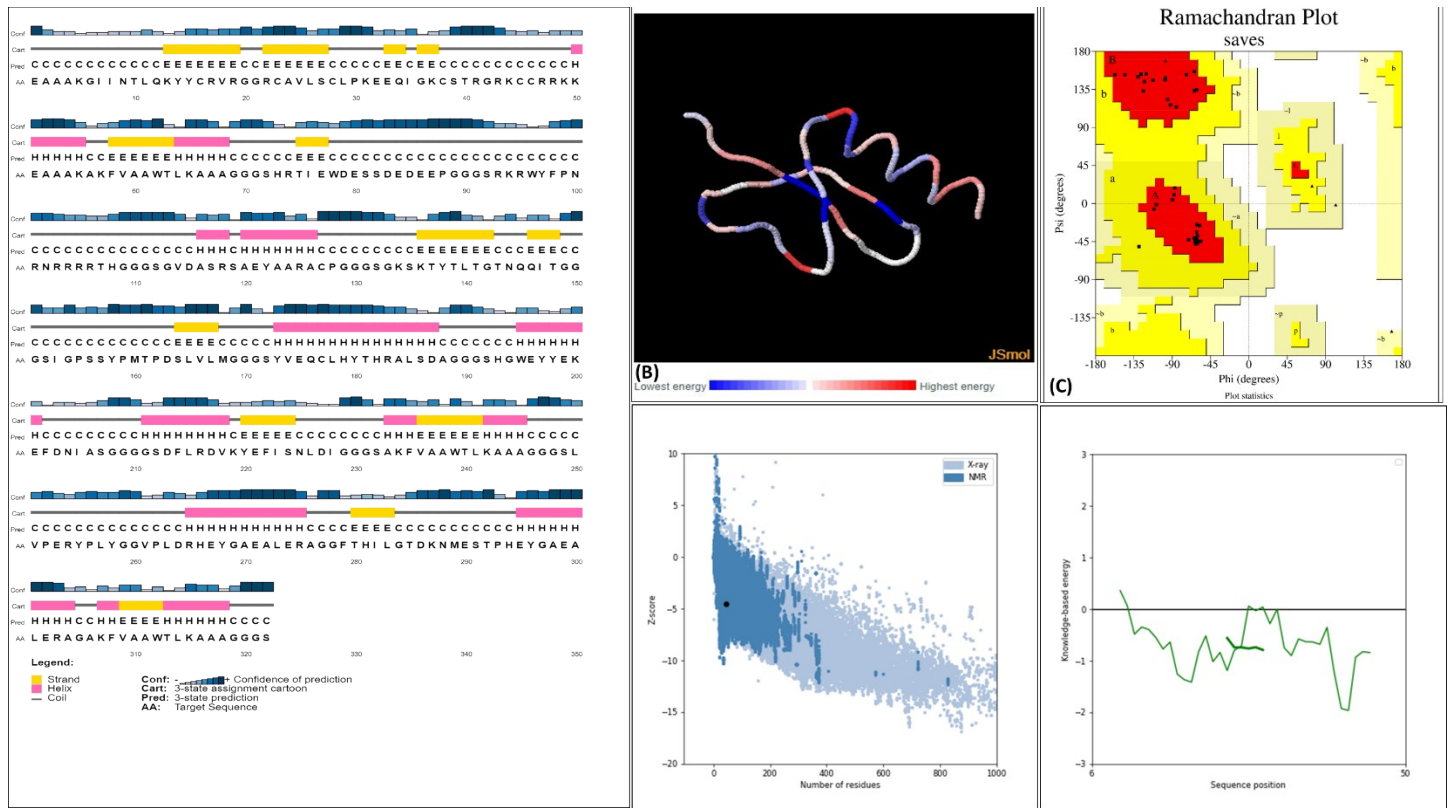

**Figure S2:** Predicted Secondary and tertiary structure, refinement and validation of MLB2-V2. (A). 2D structure of vaccine construct. (B) Refined 3D Structure. (c) Ramachandran plot of the refined structure. (D) the overall model quality, reassuringly positioning the protein structure within favored boundaries (E) highlights the local model quality, demonstrating the strong alignment of most protein segments with knowledge-based energy principles.

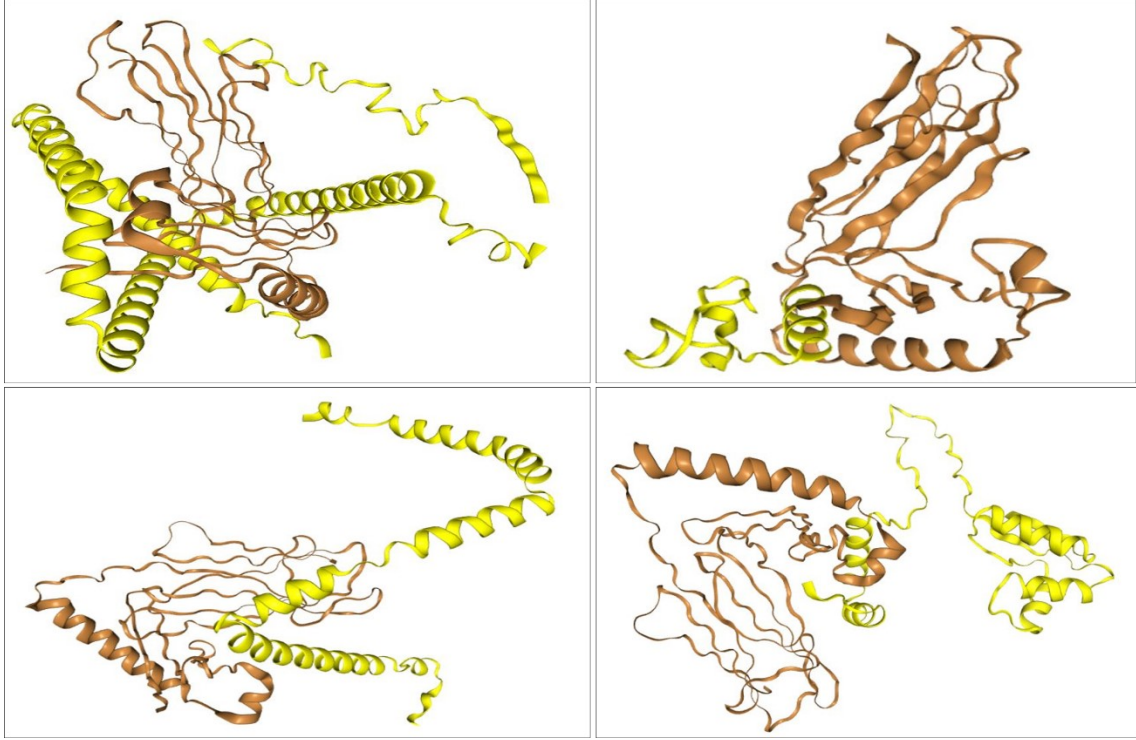

**Figure S3:** vaccine construct docked complex with HLA immune receptor.

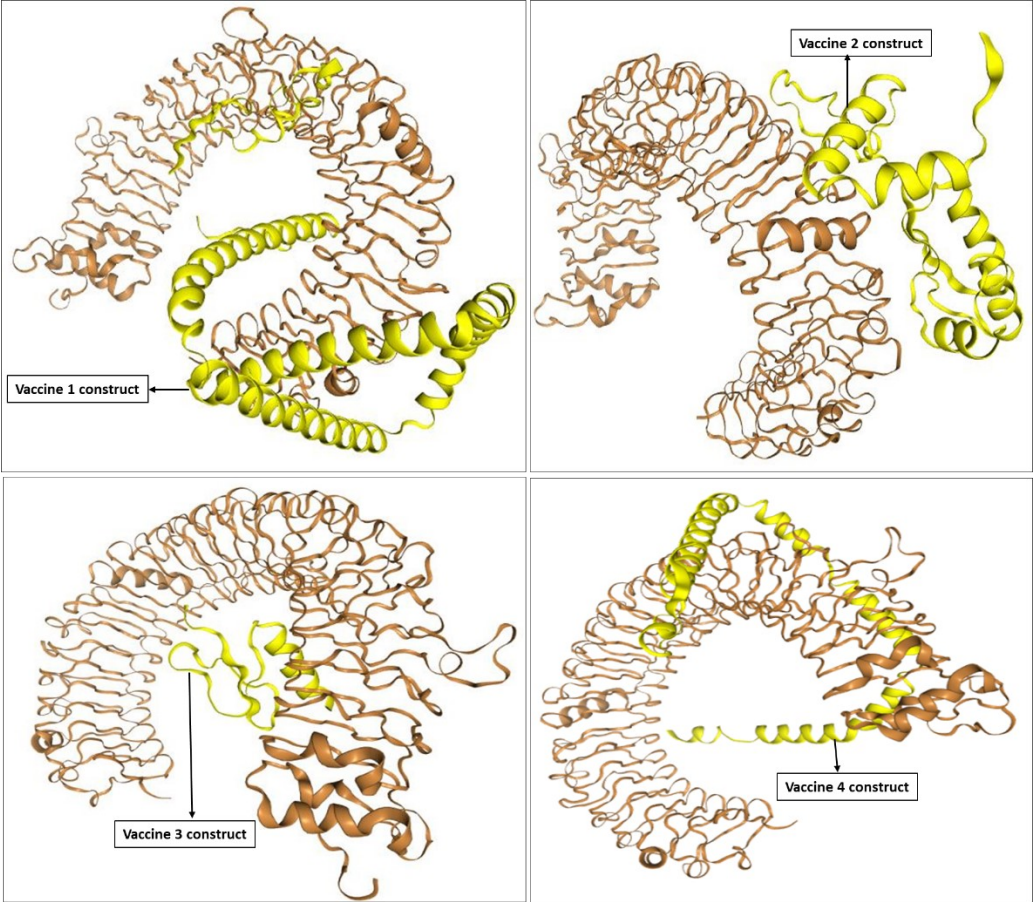

**Figure S4:** vaccine construct docked complex with TLR3 immune receptor.

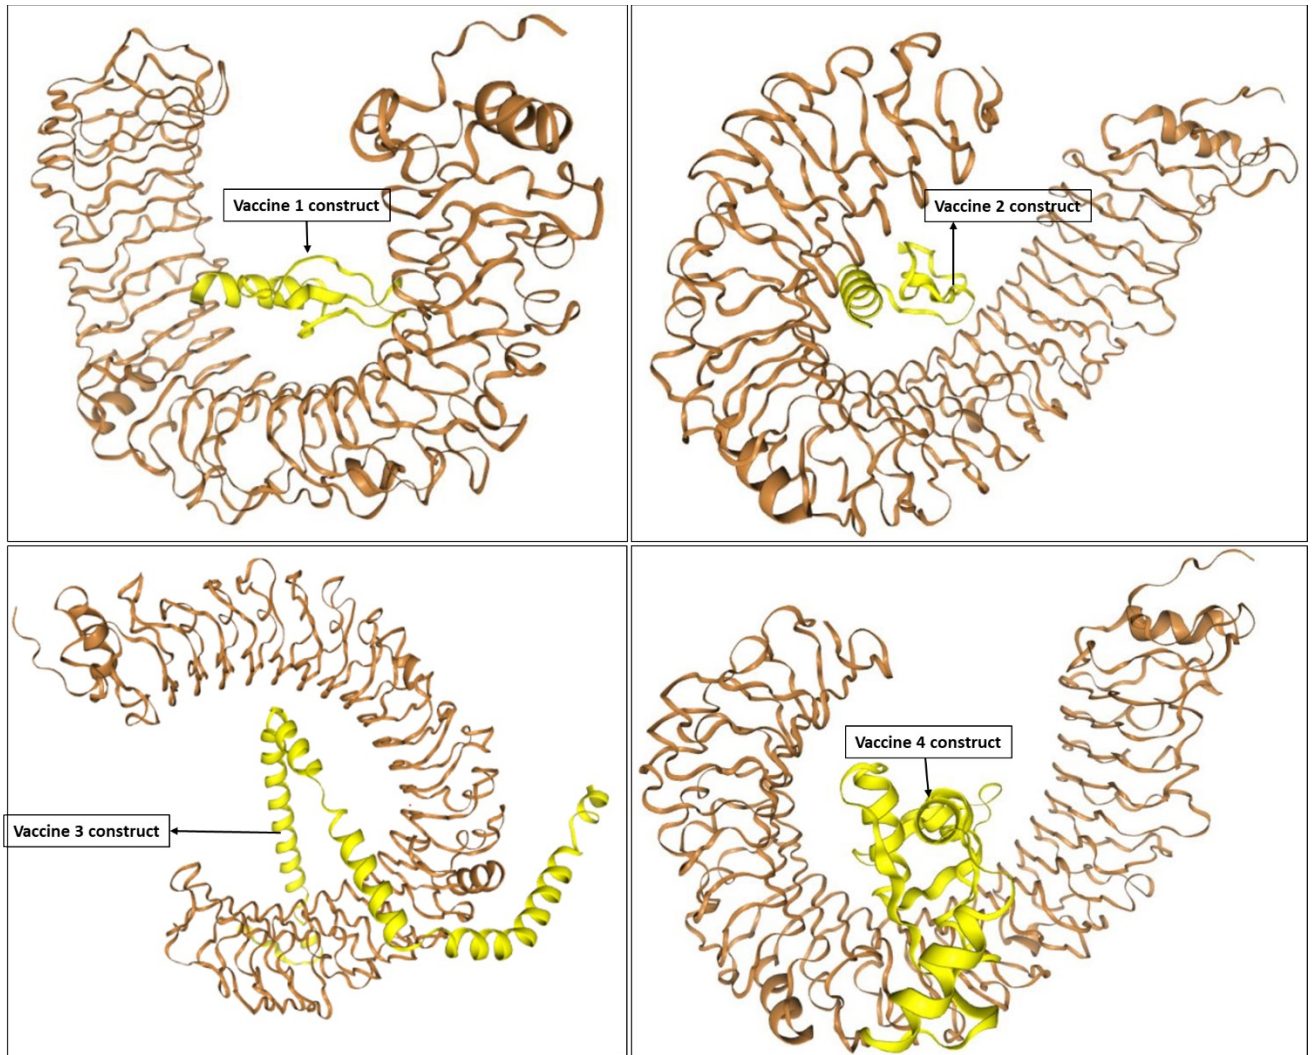

**Figure S5:** vaccine construct docked complex with TLR4 immune receptor.

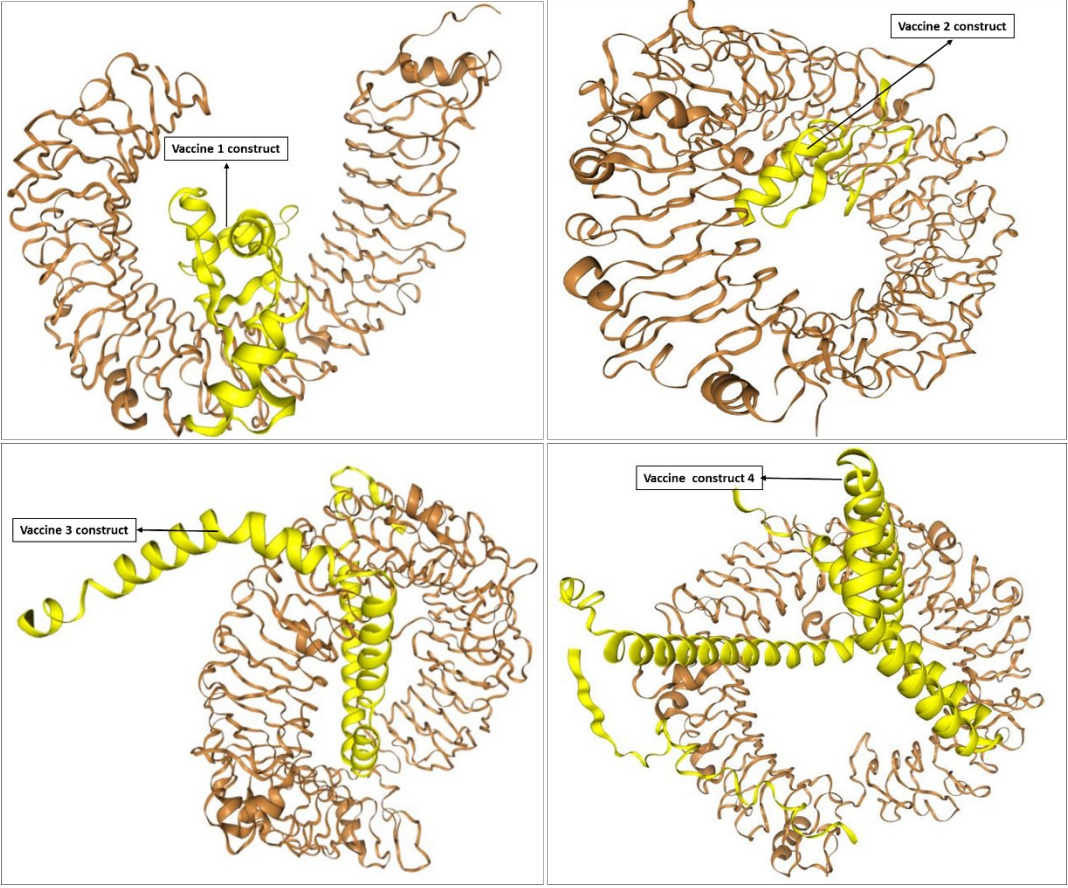

**Figure S6:** vaccine construct docked complex with TLR4 immune receptor.

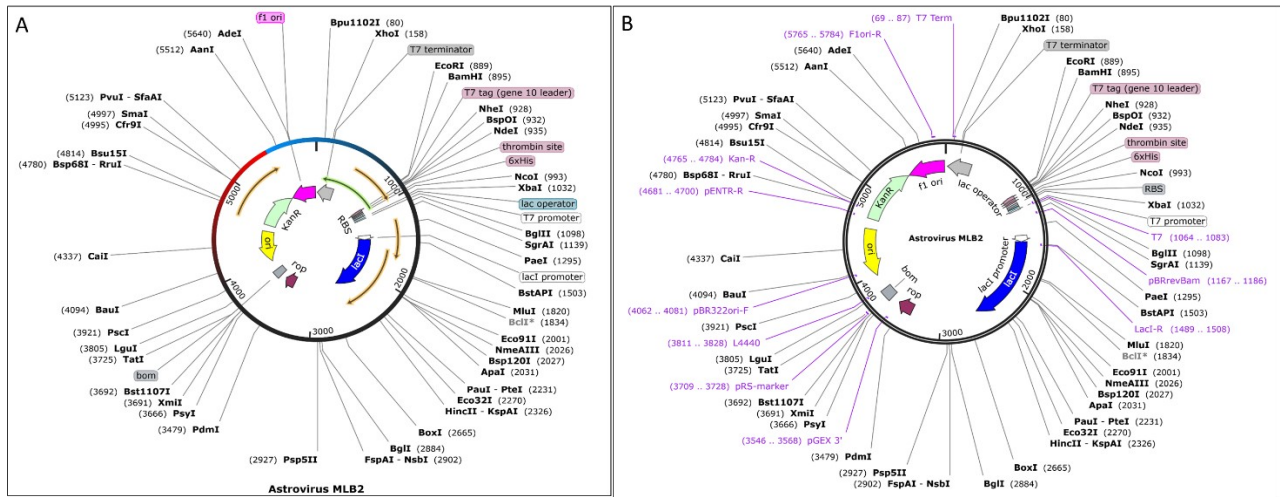

**Figure S7:** The *in-silico* cloning assessment of model vaccine constructs. Structure of MEVs is cloned in the pET-28a(+) expression vector, i.e. (A) MLB2-V1 (B) MLB2-V2.

**Table S1:** Population coverage of the top-ranked MHCs alleles across different ethnicities.

| Region          | WEU38090.1 |        | APB03098.1 |         |
|-----------------|------------|--------|------------|---------|
|                 | MHC-I      | MHC-II | MHC-I      | MHC-II  |
| Central Africa  | 98.00%     | 62.84% | 96.39%     | 62.84%  |
| Central America | 9.07%      | 53.91% | 9.07%      | 53.91%  |
| East Africa     | 98.38%     | 68.53% | 97.40%     | 68.53%  |
| East Asia       | 99.93%     | 82.41% | 99.65%     | 82.41%  |
| Europe          | 100.00%    | 87.47% | 99.99%     | 87.47%  |
| North Africa    | 99.59%     | 76.07% | 99.11%     | 76.07%  |
| North America   | 99.99%     | 90.03% | 99.84%     | 90.03%  |
| Northeast Asia  | 98.50%     | 60.80% | 98.16%     | 60.80%  |
| Oceania         | 99.13%     | 60.21% | 98.59%     | 60.21%  |
| South Africa    | 99.52%     | 32.10% | 99.99%     | 54.03%  |
| South America   | 99.34%     | 63.52% | 99.40%     | 32.10%  |
| South Asia      | 99.89%     | 76.44% | 96.65%     | 63.52%  |
| Southeast Asia  | 99.64%     | 58.83% | 98.34%     | 76.44%  |
| Southwest Asia  | 98.57%     | 45.29% | 98.53%     | 58.83%  |
| West Africa     | 99.05%     | 65.81% | 97.67%     | 45.29%  |
| West Indies     | 99.51%     | 70.02% | 98.02%     | 65.81%  |
| World           | 99.97%     | 83.81% | 99.79%     | 83.81%  |
| Average         | 94%        | 66.95% | 93.66%     | 66.22 % |
